# Supplementary material
Source: PubMed Central journal article supplement (PMC5552048)

## **SUPPLEMENTARY INFORMATION**

### **Table S1**

List of 10 genes known as being radiation-responsive in blood and selected for this study, with their symbol and biological processes.

### **Supplementary Figure S1**

CLPA gene expression profile from ex-vivo irradiated blood samples. Whole blood samples were collected from 5 volunteers and irradiated at the doses indicated and analyzed with the CLPA assay. The transcript level of BAX (A), BBC3 (B), CEBPB (C), CDKN1A (D), DDB2 (E), DEDD (F), H2AFV (G), HIST1H3D (H), MDM2 (I) and TRIB2 (J) genes normalized to the geometric mean of three housekeeping genes (MRPS5, MRPS18, CDR2) was measured at 24-hour post-exposure. Values represent mean  $\pm$  SEM. \*  $p < 0.05$  by paired Student's t-test.

### **Supplementary Figure S2**

Spearman's rank correlation between expression levels of BAX (A), BBC3 (B), CDKN1A (C), DDB2 (D) and MDM2 (E) in whole blood, as represented by normalized intensity values, and the ex-vivo radiation dose.

### **Supplementary Figure S3**

Saliva gene expression profile for each eight head and neck cancer patients. Saliva samples were collected before the start of RT (PreT), at mid-treatment (MidT) and at the end of RT (EndT) and

analyzed with the CLPA assay. The transcript level of the five genes was normalized to the geometric mean of three housekeeping genes (MRPS5, MRPS18, CDR2).

#### **Supplementary Figure S4**

Spearman's rank correlation between expression levels of MDM2 in saliva, as represented by normalized intensity values, and the total radiation dose received during RT.

Table S1

| <b>Symbol</b> | <b>Name</b>                           | <b>Biological processes</b>         |
|---------------|---------------------------------------|-------------------------------------|
| BAX           | Apoptosis regulator BAX               | apoptosis                           |
| BBC3          | BCL2 binding component 3              | apoptosis                           |
| CEBPB         | CCAAT/enhancer binding protein beta   | transcription regulation            |
| CDKN1A        | cyclin dependent kinase inhibitor 1A  | cell cycle                          |
| DEDD          | death effector domain containing      | apoptosis, transcription regulation |
| DDB2          | damage specific DNA binding protein 2 | DNA damage / DNA repair             |
| H2AFV         | H2A histone family member V           | chromatin silencing                 |
| HIST1H3D      | histone cluster 1, H3d                | chromatin silencing                 |
| MDMX          | MDM2/4                                | p53 regulation                      |
| TRIB2         | tribbles pseudokinase 2               | protein kinase inhibitor            |

Fig. S1

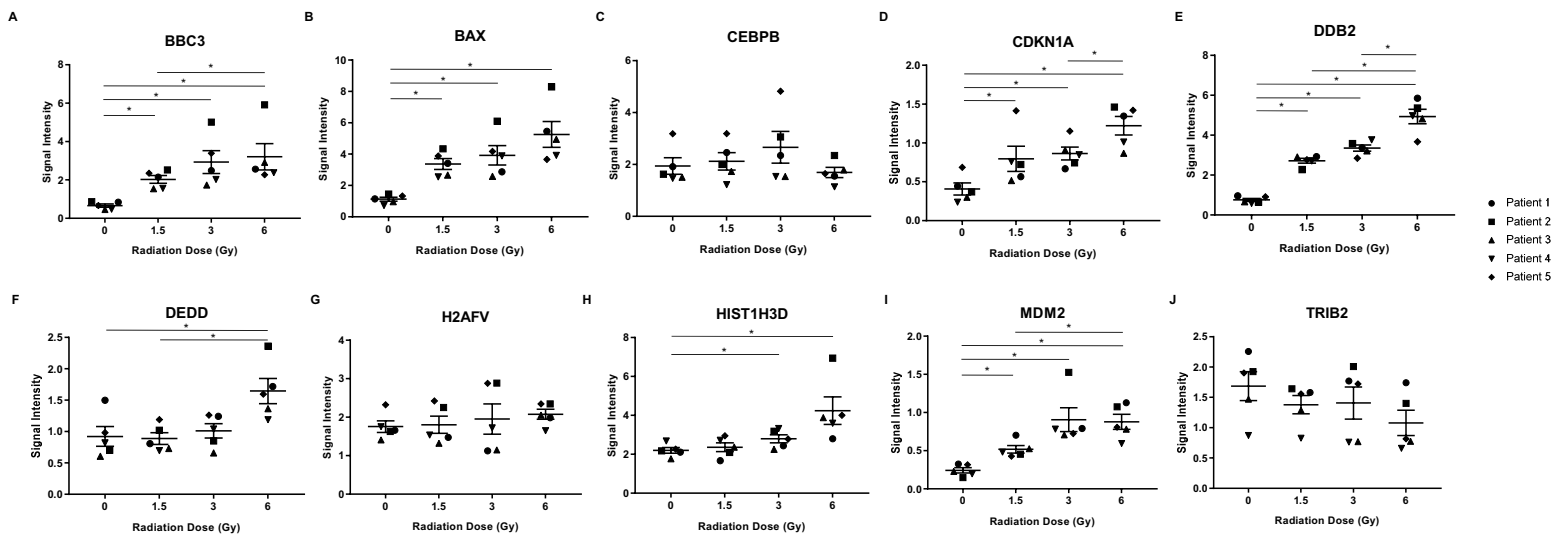

**Fig. S2**

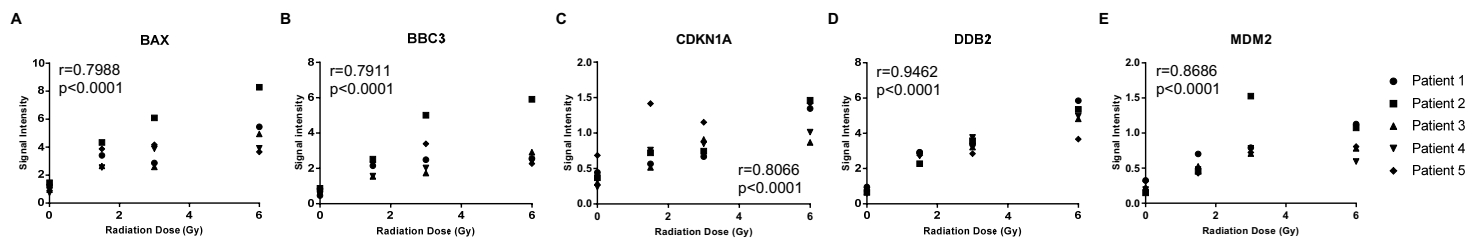

Fig. S3

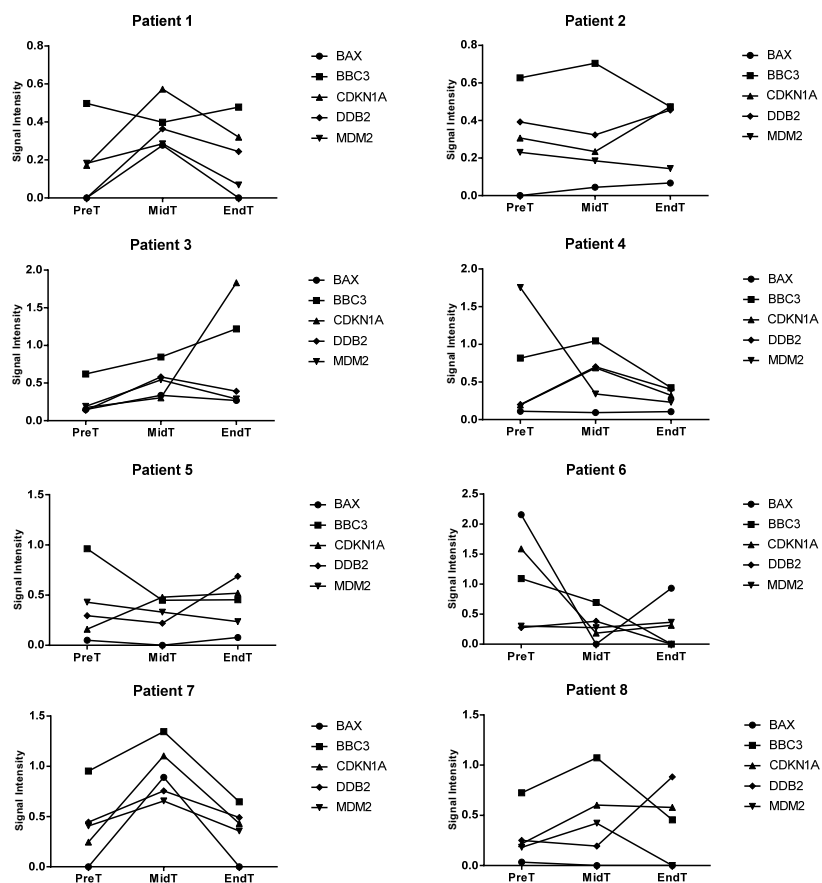

Fig. S4

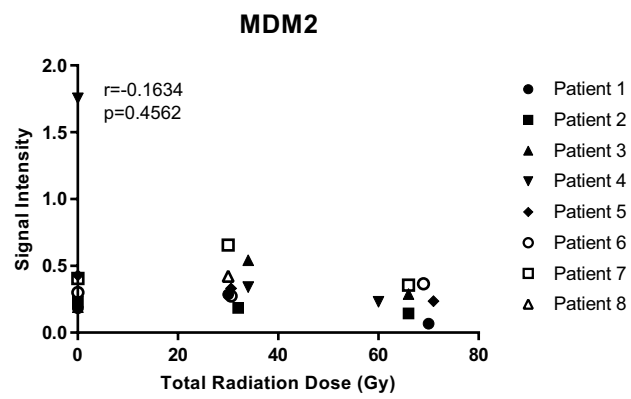

Supplement: NIHMS890621-supplement-Supplementary_file_1.pdf [file NIHMS890621-supplement-Supplementary_file_1.pdf]
